# Supplementary material
Source: PubMed Central journal article supplement (PMC4119297)
Supplement: NIHMS590160-supplement-supplement_1.pdf [file NIHMS590160-supplement-supplement_1.pdf]

## Supplementary Figure Legends

### **Figure S1 Quantitation of TYR mRNA and protein levels in WT and 402Q/Q melanocyte strains.**

(A) Q-RT-PCR analysis of TYR mRNA levels in three WT (402R/R) and three 402Q/Q melanocyte strains. (B) Endogenous protein levels of TYR in WT (lanes 1-3) and 402Q/Q (lanes 4-6).

### **Figure S2 Temperature sensitive assay of TYRP1 glycosylation in WT and 402Q/Q melanocyte strains.**

Glycosylation analysis of endogenous TYRP1 in primary melanocytes incubated at 37°C and 31°C for a 24hr time period.

### **Figure S3 Assay of TYR and TYRP1 glycosylation in 402R/Q and 192 Y/Y melanocyte strains.**

Glycosylation analysis of endogenous TYR and TYRP1 in primary melanocytes incubated at 37°.

### **Figure S4 Temperature change has no effect on melanogenesis in melanocyte strains.**

**A.** Melanin content in genotyped primary melanocytes incubated at 37°C and 31°C for a 24hr time period. **B.** Transmissive electron microscopy of melanocytes incubated at 37°C and 31°C for a 24hr time period.

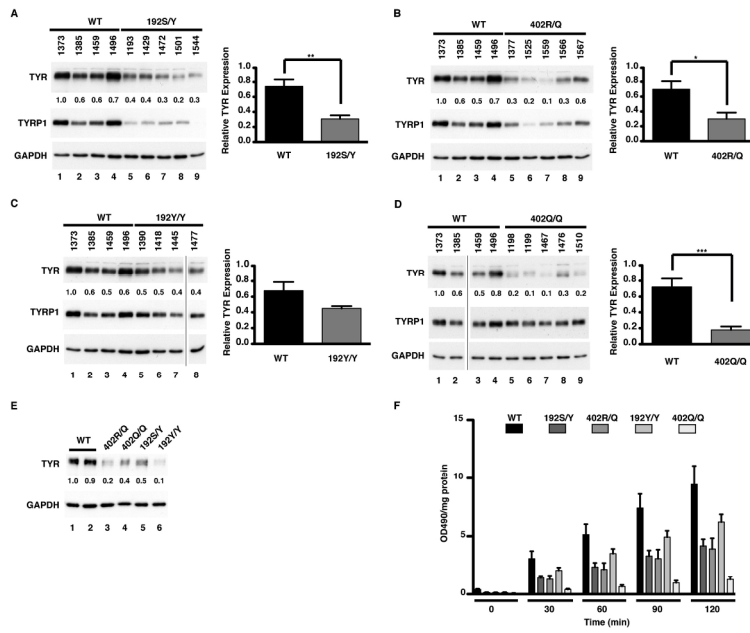

Endogenous protein expression and activity of TYR in primary melanocytes of defined genotype. 209x148mm (300 x 300 DPI)

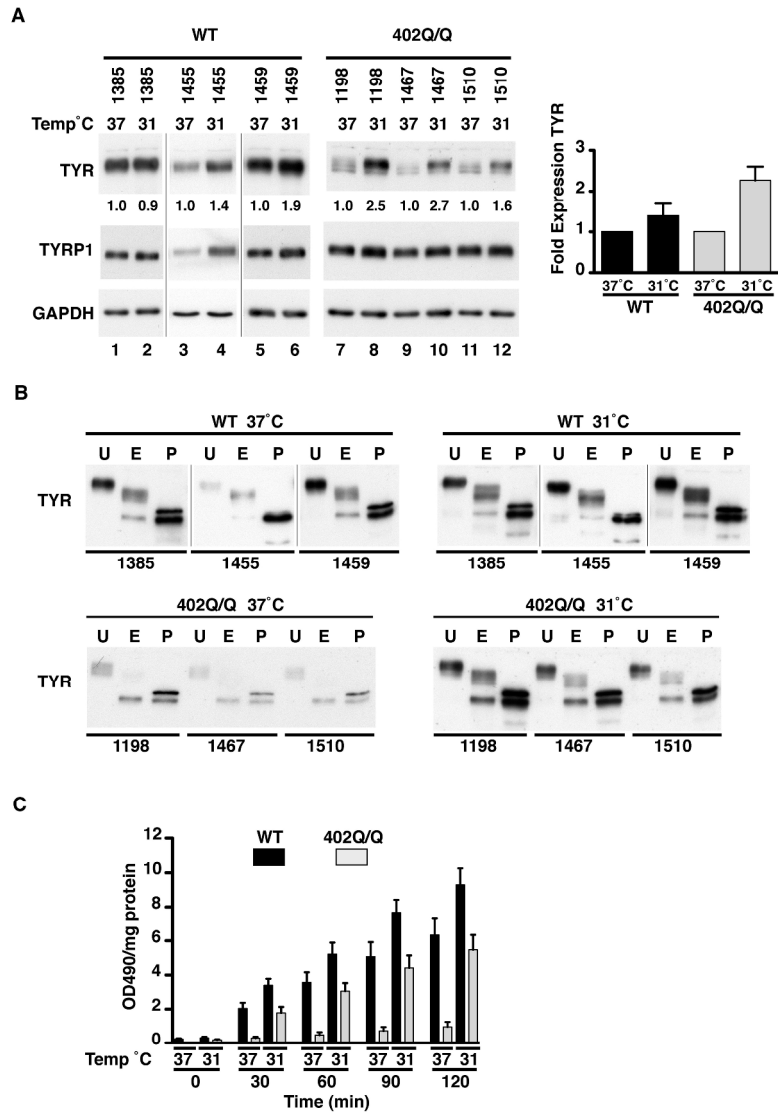

Temperature sensitive recovery of TYR activity in melanocyte strains.  
297x420mm (300 x 300 DPI)

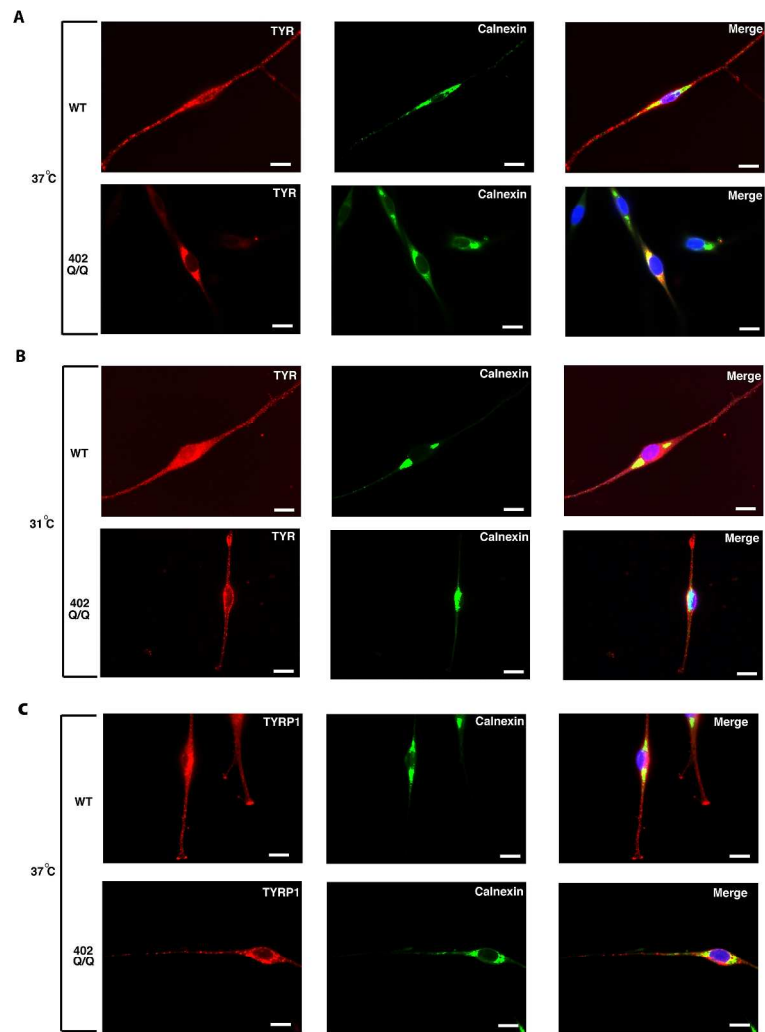

Localization of TYR in 402Q/Q melanocytic cells is temperature dependent.  
423x496mm (300 x 300 DPI)

**Table S1. Genotypes of QF melanocyte strains used in this study**

| <b>QF Strain</b> | <b>TYR-192<sup>1</sup></b> | <b>TYR-402<sup>1</sup></b> | <b>MATP-374<sup>1</sup></b> | <b>NCKX5-111<sup>1</sup></b> | <b>OCA2<sup>2</sup></b> | <b>MC1R<sup>3</sup></b> |
|------------------|----------------------------|----------------------------|-----------------------------|------------------------------|-------------------------|-------------------------|
| QF1373           | S/S                        | R/R                        | F/F                         | T/T                          | C/C                     | +/+                     |
| QF1385           | S/S                        | R/R                        | F/F                         | T/T                          | C/C                     | +/+                     |
| QF1455           | S/S                        | R/R                        | F/F                         | T/T                          | C/C                     | +/+                     |
| QF1459           | S/S                        | R/R                        | F/F                         | T/T                          | C/C                     | +/+                     |
| QF1496           | S/S                        | R/R                        | F/F                         | T/T                          | C/C                     | +/r                     |
| QF1198           | S/S                        | Q/Q                        | F/F                         | T/T                          | C/C                     | +/+                     |
| QF1199           | S/S                        | Q/Q                        | F/F                         | T/T                          | C/C                     | +/+                     |
| QF1467           | S/S                        | Q/Q                        | F/F                         | T/T                          | C/C                     | +/+                     |
| QF1476           | S/S                        | Q/Q                        | F/F                         | T/T                          | C/C                     | +/+                     |
| QF1510           | S/S                        | Q/Q                        | F/F                         | T/T                          | C/C                     | +/r                     |
| QF1377           | S/S                        | R/Q                        | F/F                         | T/T                          | C/C                     | +/+                     |
| QF1525           | S/S                        | R/Q                        | F/F                         | T/T                          | C/C                     | +/+                     |
| QF1559           | S/S                        | R/Q                        | F/F                         | T/T                          | C/C                     | +/+                     |
| QF1566           | S/S                        | R/Q                        | F/F                         | T/T                          | C/C                     | +/+                     |
| QF1567           | S/S                        | R/Q                        | F/F                         | T/T                          | C/C                     | +/+                     |
| QF1390           | Y/Y                        | R/R                        | F/F                         | T/T                          | C/C                     | r/r                     |
| QF1418           | Y/Y                        | R/R                        | F/F                         | T/T                          | C/C                     | +/+                     |
| QF1445           | Y/Y                        | R/R                        | F/F                         | T/T                          | C/C                     | +/+                     |
| QF1448           | Y/Y                        | R/R                        | F/F                         | T/T                          | C/C                     | +/+                     |
| QF1477           | Y/Y                        | R/R                        | F/F                         | T/T                          | C/C                     | r/R                     |
| QF1193           | S/Y                        | R/R                        | F/F                         | T/T                          | C/C                     | +/+                     |
| QF1429           | S/Y                        | R/R                        | F/F                         | T/T                          | C/C                     | +/+                     |
| QF1472           | S/Y                        | R/R                        | F/F                         | T/T                          | C/C                     | +/+                     |
| QF1501           | S/Y                        | R/R                        | F/F                         | T/T                          | C/C                     | +/+                     |
| QF1544           | S/Y                        | R/R                        | F/F                         | T/T                          | C/C                     | +/+                     |

<sup>1</sup> Amino acid encoded by SNPs for indicated position is given for TYR rs1042602 and rs1126809, MATP rs16891982 and NCKX5 rs1426654

<sup>2</sup> Genotype according to SNP assay for rs12913832

<sup>3</sup> For MC1R, either Consensus +/+ genotype with or variant alleles shown as R or r as defined previously

**Table S2. Genotypes of additional QF melanocyte strains for quantitation of TYR mRNA and protein levels**

| <b>QF Strain</b> | <b><i>TYR</i>-192<sup>1</sup></b> | <b><i>TYR</i>-402<sup>1</sup></b> | <b><i>MATP</i>-374<sup>1</sup></b> | <b><i>NCKX5</i>-111<sup>1</sup></b> | <b><i>OCA2</i><sup>2</sup></b> | <b><i>MC1R</i><sup>3</sup></b> |
|------------------|-----------------------------------|-----------------------------------|------------------------------------|-------------------------------------|--------------------------------|--------------------------------|
| QF1554           | S/Y                               | R/R                               | F/L                                | A/T                                 | T/T                            | +/r                            |
| QF1575           | S/S                               | R/R                               | F/L                                | T/T                                 | C/T                            | +/r                            |
| QF1579           | S/Y                               | R/R                               | F/F                                | A/T                                 | C/C                            | +/+                            |
| QF1517           | S/S                               | Q/Q                               | F/F                                | T/T                                 | T/T                            | +/r                            |

<sup>1</sup> Amino acid encoded by SNPs for indicated position is given for TYR rs1042602 and rs1126809, MATP rs16891982 and NCKX5 rs1426654

<sup>2</sup> Genotype according to SNP assay for rs12913832

<sup>3</sup> For MC1R, either Consensus +/+ genotype with or variant alleles shown as R or r as defined previously

**Table S3. Expected TYR genotype frequencies (%) and proposed strength based on an additive penentrance model**

|                                                                  |                                                                 |                         |                         |                        |                          |
|------------------------------------------------------------------|-----------------------------------------------------------------|-------------------------|-------------------------|------------------------|--------------------------|
| <b>TYR phase<sup>a</sup></b><br><b>(% frequency<sup>b</sup>)</b> |                                                                 | 1-1<br>(35.0)           | 2-1<br>(32.0)           | 1-2<br>(30.0)          | 2-2<br>(1.9)             |
|                                                                  | <b>TYR protein<sup>c</sup></b><br><b>= Strength<sup>d</sup></b> | S-R = 3                 | Y-R = 2                 | S-Q = 1                | Y-Q = 0                  |
| 1-1<br>(35.0)                                                    | S-R = 3                                                         | <b>A</b> = 6<br>(12.25) |                         |                        |                          |
| 2-1<br>(32.0)                                                    | Y-R = 2                                                         | <b>B</b> = 5<br>(22.4)  | <b>E</b> = 4<br>(10.24) |                        |                          |
| 1-2<br>(30.0)                                                    | S-Q = 1                                                         | <b>C</b> = 4<br>(21.0)  | <b>F</b> = 3<br>(19.2)  | <b>H</b> = 2<br>(9.0)  |                          |
| 2-2<br>(1.9)                                                     | Y-Q = 0                                                         | <b>D</b> = 3<br>(1.33)  | <b>G</b> = 2<br>(1.216) | <b>I</b> = 1<br>(1.14) | <b>J</b> = 0<br>(0.0361) |

<sup>a</sup>Designated for rs1042602\*C/A = 1/2 - rs1126809\*G/A = 1/2

<sup>b</sup>Haplotype frequencies as % based on Table 2

<sup>c</sup>Protein phases designated at S192Y-R402Q as 192S = 1, 192Y = 2; 402R = 1, 402Q = 2

<sup>d</sup>Based on a four point scale S-R = 3, Y-R = 2, S-Q = 1, Y-Q = 0

<sup>e</sup>Expected genotype frequency shown as a % based on Hardy-Weinberg equilibrium

**Figure S1**

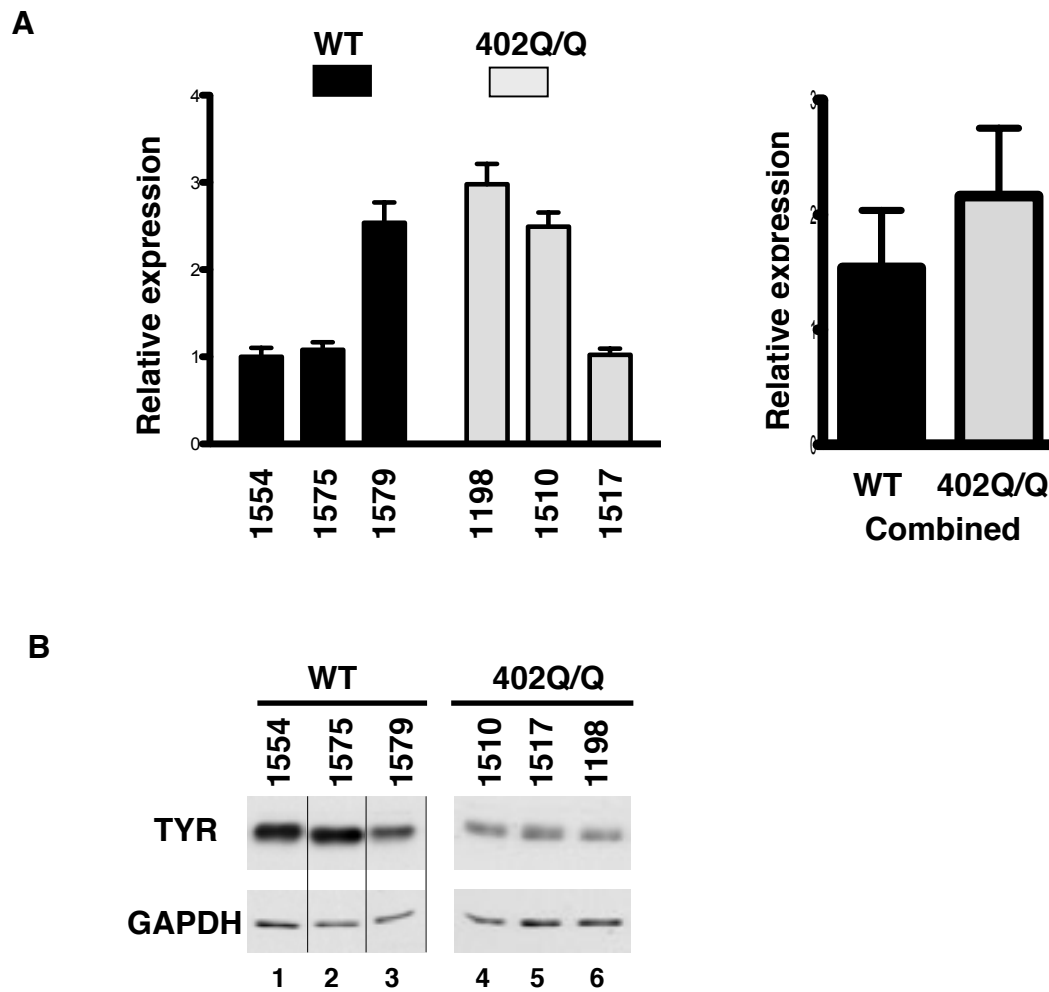

**Figure S1 Quantitation of TYR mRNA and protein levels in WT and 402Q/Q melanocyte strains.**

(A) Q-RT-PCR analysis of TYR mRNA levels in three WT (402R/R) and three 402Q/Q melanocytes strains are plotted separately in the left panel as mean + SD normalised to 18S ribosomal RNA.

In the right panel these are presented as the mean + SEM of relative expression of combined WT or 402Q/Q assays. (B) Endogenous protein levels of TYR in WT (lanes 1-3) and 402Q/Q (lanes 4-6) GAPDH was used to determine protein loading.



**Figure S2**

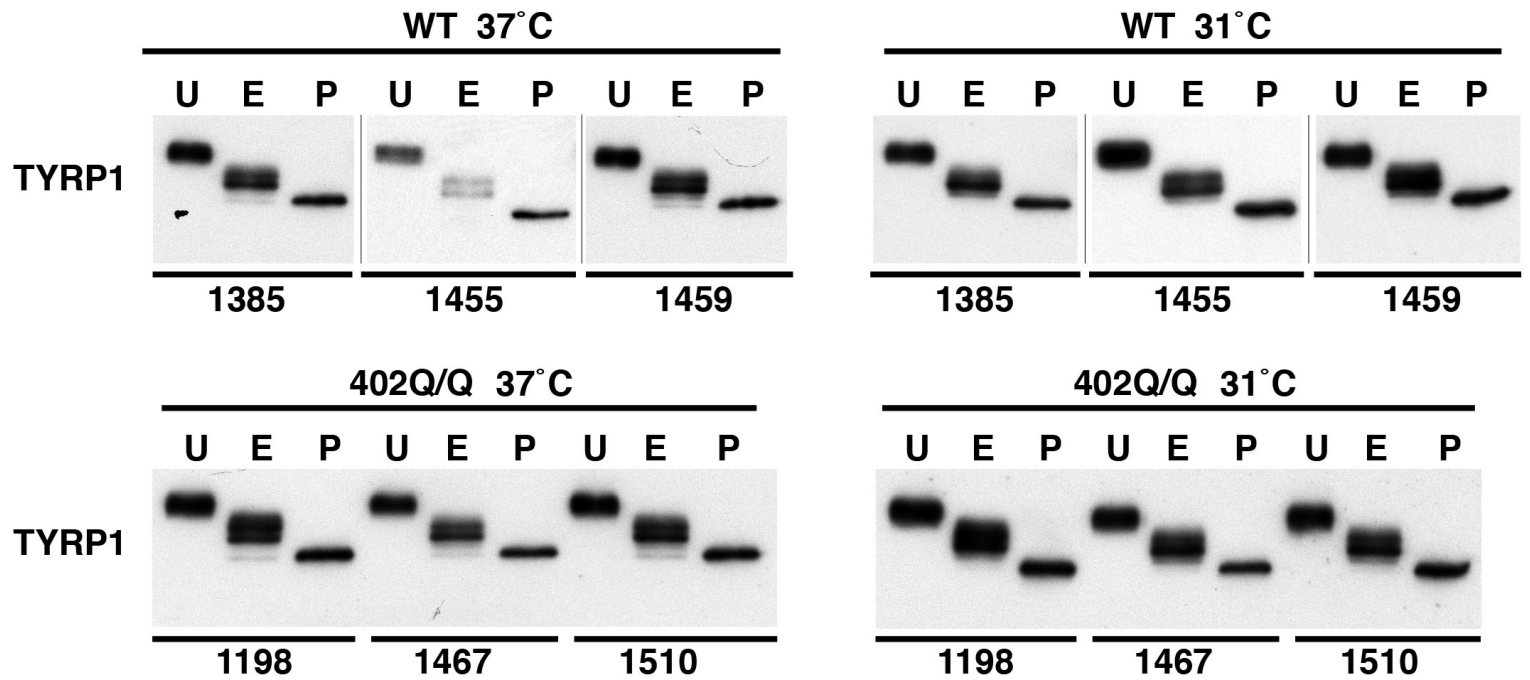

**Figure S2 Temperature sensitive assay of TYRP1 glycosylation in WT and 402Q/Q melanocyte strains.**

Glycosylation analysis of endogenous TYRP1 in primary melanocytes incubated at 37°C and 31°C for a 24hr time period. Protein cell lysates of genotyped primary melanocytes, WT (n=3) and 402Q/Q (n=3), were untreated (U) or digested with the glycosidase EndoH (E) or PNGaseF (P). Samples were immunoblotted and probed with anti-TYRP1 antibody to determine the extent of digestion. Vertical lines indicate sample (1455) was run on a different gel.

**Figure S3**

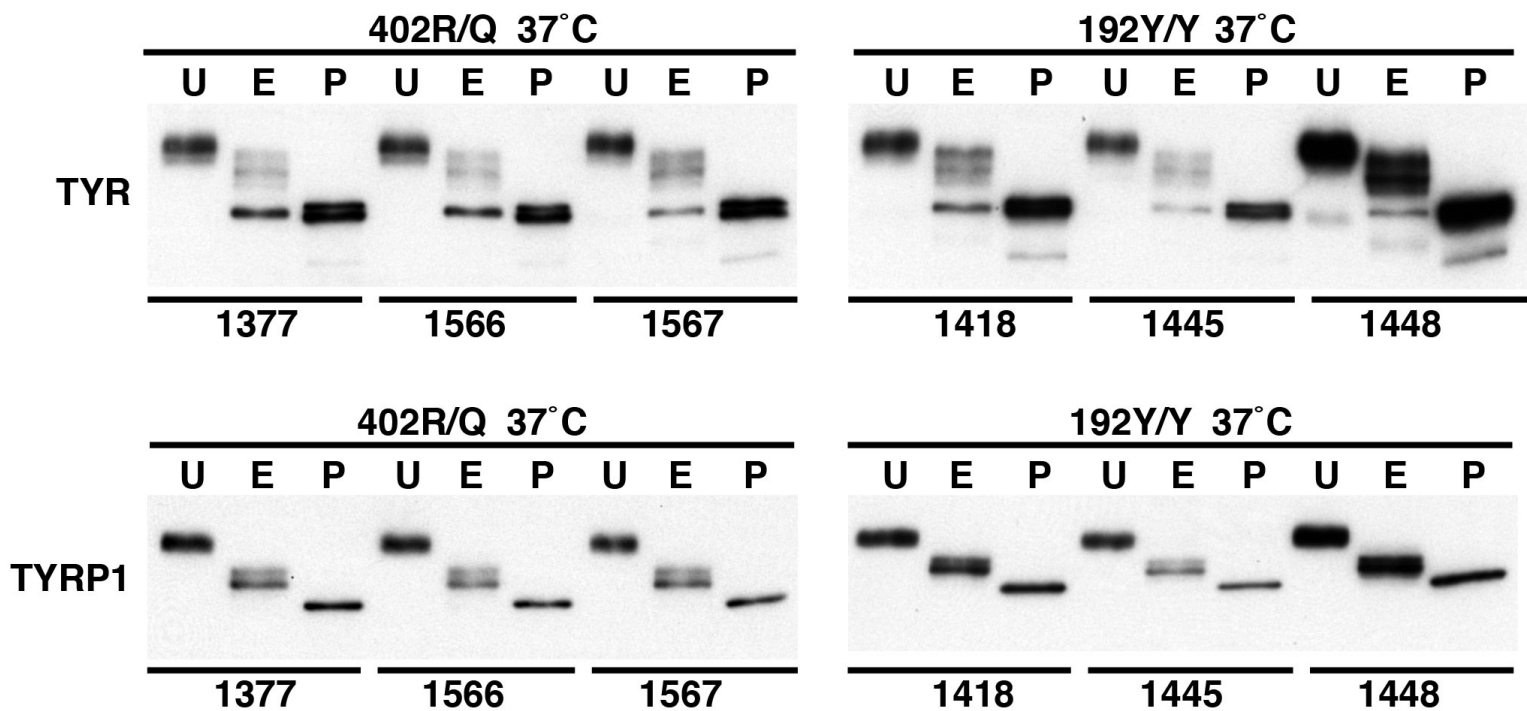

**Figure S3 Assay of TYR and TYRP1 glycosylation in 402R/Q and 192 Y/Y melanocyte strains.**

Glycosylation analysis of endogenous TYR and TYRP1 in primary melanocytes incubated at 37°.

Protein cell lysates of genotyped primary melanocytes, 402R/Q (n=3) and 192Y/Y (n=3) were

untreated (U) or digested with the glycosidase EndoH (E) or PNGaseF (P). Samples were

immunoblotted and probed with anti-TYR and anti-TYRP1 antibodies to determine the extent of digestion.

Figure S4

A

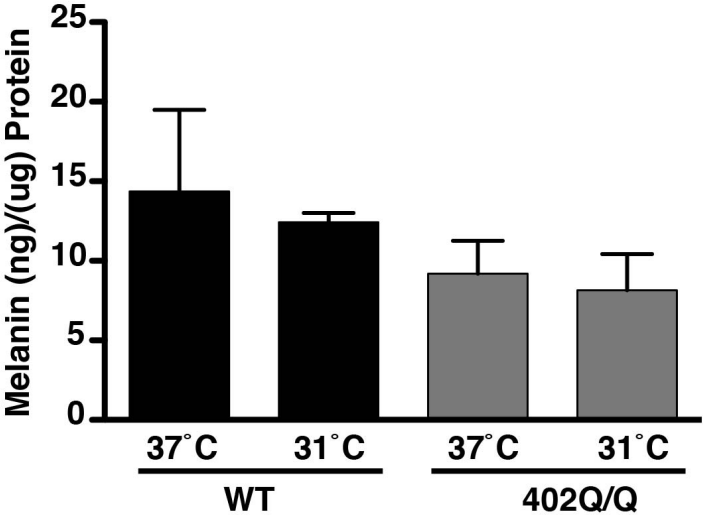

B

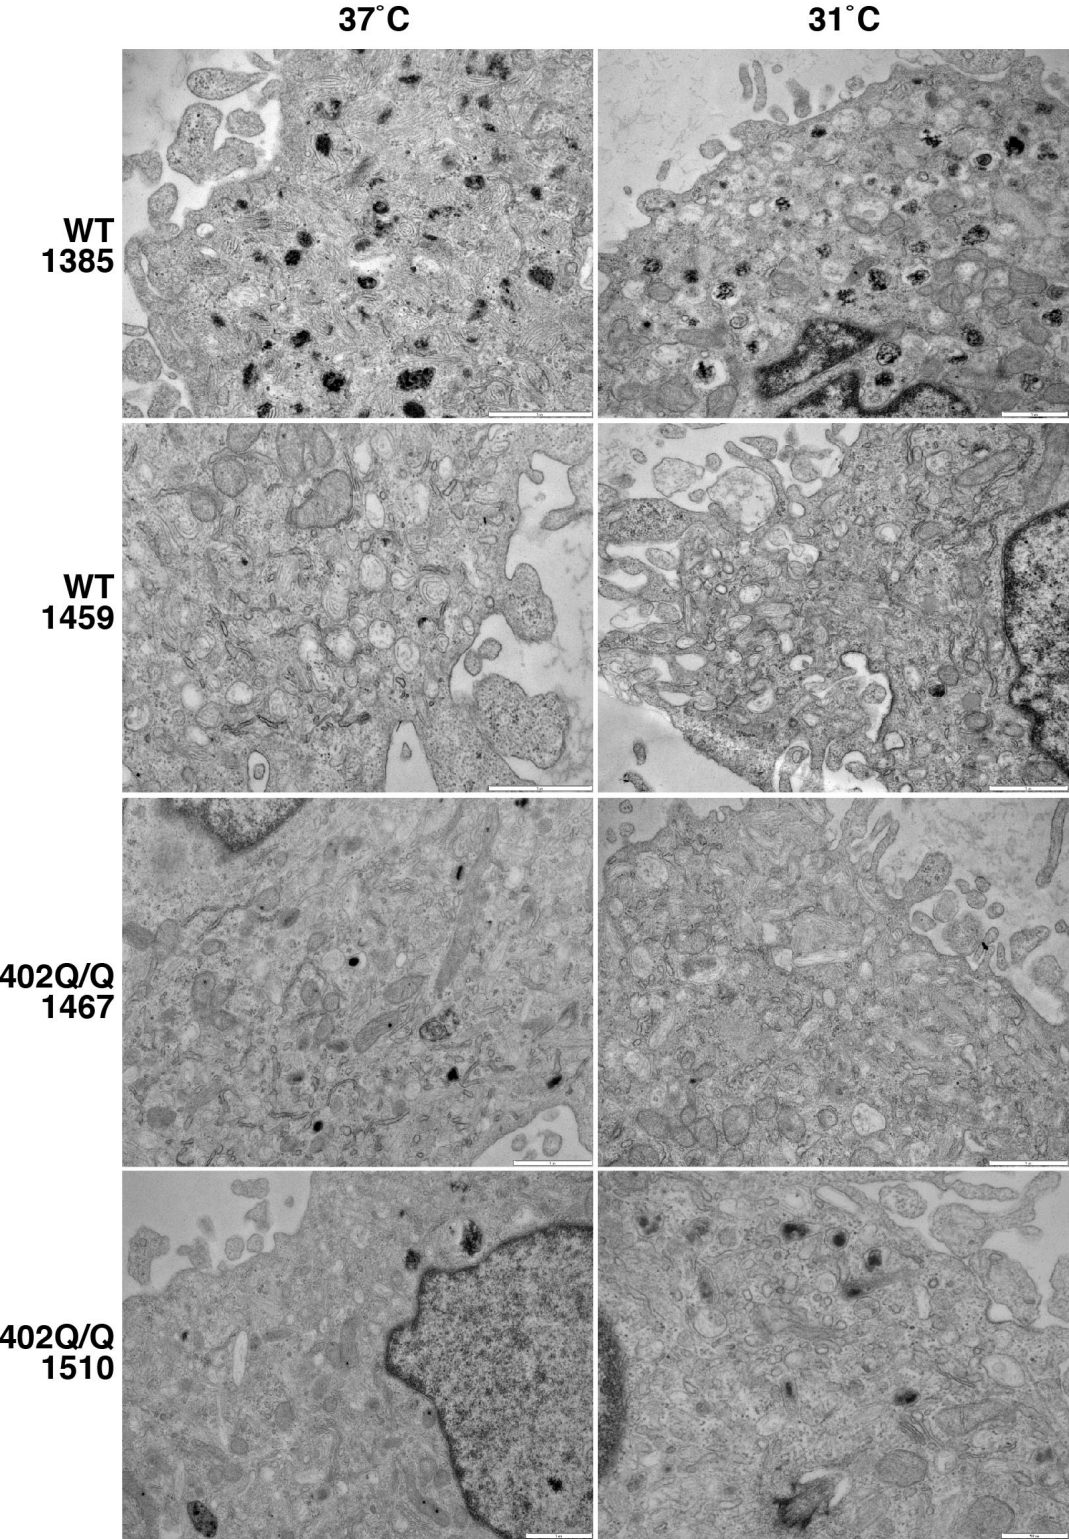

**Figure S4 Temperature change has no effect on melanogenesis in melanocyte strains.**

**A.** Melanin content in genotyped primary melanocytes incubated at 37°C and 31°C for a 24hr time period. Values represent the mean + SEM (n=3) of 3 different melanocyte strains of each genotype normalised to total protein. **B.** Transmissive electron microscopy of melanocytes incubated at 37°C and 31°C for a 24hr time period. Micrographs are representative of genotyped primary melanocytes, WT (n=2) and 402Q/Q (n=2). Scale bar = 1µm.
